# Supplementary material
Source: Research Square preprint supplement (doi:10.21203/rs.3.rs-10280514/v1)
Supplement: Supplementary file 1 [file 990b875949ee5faa6f79e3a1.docx]

*Supplementary Information for:*

**The Socio-Evolutionary Algorithm: trust, imitation and exploration in repeated adaptive decisions**

Do-Yeong Kim*

*Department of Management, School of Business, Ajou University, Suwon, Republic of Korea*

ORCID: 0000-0002-1487-9998

*Correspondence: kimd@ajou.ac.kr

**Terminology note.** The main manuscript uses Core SEA and Adaptive SEA. These terms correspond to the source-code variants formerly labelled SEA_Original and SEA_Improved, respectively. The Supplementary Information uses the manuscript terms in narrative and tables while preserving machine-readable source files in the package for reproducibility. The cohort labelled European_University_Exchange_Students in the main text and Supplementary Information is coded as European_Students in the public source tables, the analysis-ready derived backbone and the verification scripts.

This Supplementary Information uses only the locked Phase 1–4 and revised Section 9.1 outputs. Numerical claims from external audit text or unverified prior handoffs are not used. Machine-readable CSV files are included in the source_tables directory of the submission package and reproducibility archive. Key abbreviations used throughout: Socio-Evolutionary Algorithm (SEA), two one-sided tests (TOST), standardised mean difference (SMD), Kolmogorov–Smirnov (KS), negative log-likelihood (NLL), false discovery rate (FDR), confidence interval (CI), evolutionary algorithm (EA), reinforcement learning (RL), upper confidence bound (UCB).

**S1. Cohort composition and outcome definitions**

Supplementary Table S1 reports the ten cohorts included in the locked dataset. The primary analysis used five pre-specified participant-level outcomes: TOTAL_DEBT (gross terminal debt), FINAL_TOTAL_DEBT (terminal debt net of cash available at the end of the protocol), NOAM_MEAN (mean share of repayment not allocated to the highest-interest eligible debt across rounds), SAVING_TOTAL_AMOUNT (cumulative saving amount) and SAVING_FREQUENCY (number of rounds in which saving occurred).

**Supplementary Table S1 | Cohort composition.**

| **Cohort** | **Country/context** | **N** |
| --- | --- | --- |
| Chinese_Employees | China | 148 |
| Credit_Defaulters | South Korea | 179 |
| European_University_Exchange_Students | Europe / exchange cohort | 99 |
| Expectant_Couples | South Korea | 122 |
| Korean_Adolescents | South Korea | 100 |
| Korean_Senior | South Korea | 50 |
| Korean_Small_Business_Owner | South Korea | 70 |
| Korean_Univ_Students | South Korea | 642 |
| Married_Couples_35to45 | South Korea | 120 |
| US_Students | United States | 92 |
| Total |  | 1,622 |

**S2. Descriptive statistics and cross-cohort heterogeneity**

Supplementary Table S2 reports pooled descriptive statistics and cohort-specific summaries where available. Supplementary Table S3 reports random-effects estimates and heterogeneity indices. High I² values support heterogeneity-aware interpretation.

**Supplementary Table S2 | Pooled and cohort-level descriptive statistics.**

| **Scope** | **Outcome** | **N** | **Mean** | **SD** | **Median** | **Q1** | **Q3** | **Min** | **Max** |
| --- | --- | --- | --- | --- | --- | --- | --- | --- | --- |
| Pooled | TOTAL_DEBT | 1,622 | 59,451.82 | 55,240.83 | 44,021.68 | 35,866.00 | 52,843.82 | 29,427.97 | 364,081.16 |
| Pooled | FINAL_TOTAL_DEBT | 1,622 | 47,012.09 | 21,904.11 | 41,867.10 | 34,312.66 | 48,642.77 | 26,063.64 | 143,181.30 |
| Pooled | NOAM_MEAN | 1,622 | 0.568 | 0.236 | 0.590 | 0.447 | 0.728 | 0.000 | 1.000 |
| Pooled | SAVING_TOTAL_AMOUNT | 1,622 | 237,564.73 | 505,819.17 | 53,761.32 | 10,515.47 | 212,771.61 | 0 | 2,940,654.32 |
| Pooled | SAVING_FREQUENCY | 1,622 | 15.91 | 10.12 | 21.00 | 4.00 | 25.00 | 0 | 25.00 |
| Chinese_Employees | TOTAL_DEBT | 148 | 54,912.55 | 42,749.04 | 45,655.97 | 41,296.96 | 51,244.50 | 29,454.24 | 360,251.65 |
| Chinese_Employees | FINAL_TOTAL_DEBT | 148 | 46,670.18 | 11,953.21 | 45,166.53 | 40,920.88 | 49,695.17 | 29,454.24 | 109,606.19 |
| Chinese_Employees | NOAM_MEAN | 148 | 0.609 | 0.208 | 0.620 | 0.511 | 0.731 | 0.004 | 1.000 |
| Chinese_Employees | SAVING_TOTAL_AMOUNT | 148 | 218,387.85 | 419,284.82 | 83,457.58 | 15,289.19 | 198,256.74 | 0 | 2,884,528.36 |
| Chinese_Employees | SAVING_FREQUENCY | 148 | 16.53 | 9.07 | 20.00 | 10.25 | 25.00 | 0 | 25.00 |
| Credit_Defaulters | TOTAL_DEBT | 179 | 71,236.28 | 78,554.46 | 46,632.70 | 39,120.56 | 55,853.56 | 29,427.97 | 364,081.16 |
| Credit_Defaulters | FINAL_TOTAL_DEBT | 179 | 50,718.30 | 20,971.75 | 46,101.94 | 39,008.57 | 52,954.43 | 29,427.97 | 142,658.84 |
| Credit_Defaulters | NOAM_MEAN | 179 | 0.595 | 0.259 | 0.616 | 0.455 | 0.799 | 0.000 | 1.000 |
| Credit_Defaulters | SAVING_TOTAL_AMOUNT | 179 | 371,538.33 | 731,949.84 | 72,411.51 | 18,658.97 | 263,429.47 | 0 | 2,940,654.32 |
| Credit_Defaulters | SAVING_FREQUENCY | 179 | 18.25 | 9.23 | 24.00 | 10.50 | 25.00 | 0 | 25.00 |
| European_University_Exchange_Students | TOTAL_DEBT | 99 | 65,497.78 | 62,859.23 | 43,711.53 | 39,842.58 | 50,951.60 | 29,427.97 | 364,081.16 |
| European_University_Exchange_Students | FINAL_TOTAL_DEBT | 99 | 51,040.73 | 26,160.65 | 43,372.50 | 39,105.28 | 48,796.10 | 29,427.97 | 142,987.04 |
| European_University_Exchange_Students | NOAM_MEAN | 99 | 0.545 | 0.243 | 0.572 | 0.442 | 0.683 | 0.000 | 1.000 |
| European_University_Exchange_Students | SAVING_TOTAL_AMOUNT | 99 | 225,708.81 | 534,745.95 | 41,586.42 | 9,904.83 | 138,898.08 | 0 | 2,940,654.32 |
| European_University_Exchange_Students | SAVING_FREQUENCY | 99 | 14.52 | 10.27 | 19.00 | 3.00 | 25.00 | 0 | 25.00 |

*Note: Table truncated for display. The complete cohort-level descriptive statistics for all ten cohorts are provided in source_tables/descriptive_stats_cohort_level.csv.*

**S3. Random-effects heterogeneity**

The random-effects table summarises between-cohort variability for each primary outcome.

**Supplementary Table S3 | Random-effects estimates and heterogeneity indices.**

| **Outcome** | **k cohorts** | **RE mean** | **SE** | **95% CI lower** | **95% CI upper** | **τ²** | **I² (%)** | **Q** | **df** |
| --- | --- | --- | --- | --- | --- | --- | --- | --- | --- |
| TOTAL_DEBT | 10 | 57,013.25 | 3,094.29 | 50,948.45 | 63,078.06 | 73,049,525.00 | 82.21 | 50.58 | 9 |
| FINAL_TOTAL_DEBT | 10 | 46,243.64 | 1,636.46 | 43,036.17 | 49,451.10 | 23,509,404.32 | 91.30 | 103.48 | 9 |
| NOAM_MEAN | 10 | 0.549 | 0.021 | 0.508 | 0.591 | 0.004 | 91.50 | 105.84 | 9 |
| SAVING_TOTAL_AMOUNT | 10 | 225,130.39 | 29,152.36 | 167,991.77 | 282,269.02 | 6,504,137,053.47 | 82.72 | 52.07 | 9 |
| SAVING_FREQUENCY | 10 | 15.21 | 1.02 | 13.21 | 17.21 | 9.57 | 93.65 | 141.84 | 9 |

**S4. Bootstrap augmentation and TOST equivalence**

TOST equivalence was evaluated separately at the pooled dataset level and within each cohort-by-outcome cell. The results distinguish dataset-level distribution preservation from within-cohort interchangeability.

**Supplementary Table S4 | TOST equivalence summary at pooled and within-cohort levels.**

| **Level** | **Unit** | **Margin** | **Pass** | **Total** | **Pass rate (%)** | **Interpretation** |
| --- | --- | --- | --- | --- | --- | --- |
| Primary pooled TOST | Full N=1,622 pooled sample | ±0.10 SD | 5 | 5 | 100.00 | Primary evidence for distribution preservation at the dataset level |
| Secondary within-cohort TOST | Cohort × outcome | ±0.10 SD | 2 | 50 | 4.00 | Precision-limited diagnostic under high between-cohort heterogeneity |

**Supplementary Table S4b | Full 50-cell within-cohort TOST diagnostic.**

This table provides the previously missing cohort-by-outcome TOST source output. The SMD is reported as Hedges’ g with pooled standard deviation and small-sample bias correction; the 90% CI is constructed using the standard normal-approximation standard error. Equivalence was counted as passing only when the entire 90% CI fell strictly inside the pre-specified ±0.10 SD margin. The diagnostic confirms that 2 of 50 cohort-by-outcome cells passed the strict within-cohort criterion. Full formula details are given in source_tables/TableS4b_Methodology_Note.md. The 50-cell diagnostic can be regenerated from data_derived/analysis_backbone_minimal.csv using scripts/reproduce_all_from_derived_source.py and independently verified using scripts/verify_50cell_tost.py. All 50 cells have |Hedges’ g| < 0.10 in point estimate, and 47 of 50 have |g| < 0.05; the 2/50 inferential pass rate reflects cohort-level CI precision (CI half-widths of approximately 0.083 to 0.238 across cohorts of size 50 to 642) rather than substantive distributional misalignment.

| **Cohort** | **Outcome** | **Actual n** | **Augmented n** | **SMD** | **90% CI lower** | **90% CI upper** | **TOST pass** |
| --- | --- | --- | --- | --- | --- | --- | --- |
| Chinese_Employees | TOTAL_DEBT | 148 | 1,000 | -0.011 | -0.155 | 0.134 | FALSE |
| Chinese_Employees | FINAL_TOTAL_DEBT | 148 | 1,000 | 0.025 | -0.119 | 0.170 | FALSE |
| Chinese_Employees | NOAM_MEAN | 148 | 1,000 | 0.017 | -0.128 | 0.162 | FALSE |
| Chinese_Employees | SAVING_TOTAL_AMOUNT | 148 | 1,000 | 0.003 | -0.142 | 0.148 | FALSE |
| Chinese_Employees | SAVING_FREQUENCY | 148 | 1,000 | 0.005 | -0.140 | 0.150 | FALSE |
| Credit_Defaulters | TOTAL_DEBT | 179 | 1,000 | -0.006 | -0.139 | 0.128 | FALSE |
| Credit_Defaulters | FINAL_TOTAL_DEBT | 179 | 1,000 | -0.010 | -0.144 | 0.123 | FALSE |
| Credit_Defaulters | NOAM_MEAN | 179 | 1,000 | 0.005 | -0.128 | 0.139 | FALSE |
| Credit_Defaulters | SAVING_TOTAL_AMOUNT | 179 | 1,000 | 0.009 | -0.125 | 0.142 | FALSE |
| Credit_Defaulters | SAVING_FREQUENCY | 179 | 1,000 | 0.009 | -0.125 | 0.142 | FALSE |
| European_University_Exchange_Students | TOTAL_DEBT | 99 | 1,000 | -0.008 | -0.182 | 0.165 | FALSE |
| European_University_Exchange_Students | FINAL_TOTAL_DEBT | 99 | 1,000 | -0.010 | -0.183 | 0.164 | FALSE |
| European_University_Exchange_Students | NOAM_MEAN | 99 | 1,000 | -0.022 | -0.195 | 0.151 | FALSE |
| European_University_Exchange_Students | SAVING_TOTAL_AMOUNT | 99 | 1,000 | -0.027 | -0.200 | 0.147 | FALSE |
| European_University_Exchange_Students | SAVING_FREQUENCY | 99 | 1,000 | -0.003 | -0.176 | 0.170 | FALSE |
| Expectant_Couples | TOTAL_DEBT | 122 | 1,000 | -0.058 | -0.216 | 0.100 | FALSE |
| Expectant_Couples | FINAL_TOTAL_DEBT | 122 | 1,000 | -0.044 | -0.202 | 0.113 | FALSE |
| Expectant_Couples | NOAM_MEAN | 122 | 1,000 | 0.022 | -0.136 | 0.179 | FALSE |
| Expectant_Couples | SAVING_TOTAL_AMOUNT | 122 | 1,000 | -0.059 | -0.217 | 0.098 | FALSE |
| Expectant_Couples | SAVING_FREQUENCY | 122 | 1,000 | 0.009 | -0.149 | 0.167 | FALSE |
| Korean_Adolescents | TOTAL_DEBT | 100 | 1,000 | 0.025 | -0.147 | 0.198 | FALSE |
| Korean_Adolescents | FINAL_TOTAL_DEBT | 100 | 1,000 | 0.033 | -0.139 | 0.206 | FALSE |
| Korean_Adolescents | NOAM_MEAN | 100 | 1,000 | 0.040 | -0.132 | 0.213 | FALSE |
| Korean_Adolescents | SAVING_TOTAL_AMOUNT | 100 | 1,000 | 0.019 | -0.154 | 0.191 | FALSE |
| Korean_Adolescents | SAVING_FREQUENCY | 100 | 1,000 | 0.043 | -0.130 | 0.215 | FALSE |
| Korean_Senior | TOTAL_DEBT | 50 | 1,000 | 0.036 | -0.203 | 0.274 | FALSE |
| Korean_Senior | FINAL_TOTAL_DEBT | 50 | 1,000 | 0.026 | -0.213 | 0.264 | FALSE |
| Korean_Senior | NOAM_MEAN | 50 | 1,000 | 0.030 | -0.209 | 0.268 | FALSE |
| Korean_Senior | SAVING_TOTAL_AMOUNT | 50 | 1,000 | 0.038 | -0.200 | 0.276 | FALSE |
| Korean_Senior | SAVING_FREQUENCY | 50 | 1,000 | 0.029 | -0.210 | 0.267 | FALSE |
| Korean_Small_Business_Owner | TOTAL_DEBT | 70 | 1,000 | 0.016 | -0.188 | 0.219 | FALSE |
| Korean_Small_Business_Owner | FINAL_TOTAL_DEBT | 70 | 1,000 | 0.012 | -0.192 | 0.215 | FALSE |
| Korean_Small_Business_Owner | NOAM_MEAN | 70 | 1,000 | 0.007 | -0.197 | 0.210 | FALSE |
| Korean_Small_Business_Owner | SAVING_TOTAL_AMOUNT | 70 | 1,000 | 0.005 | -0.199 | 0.208 | FALSE |
| Korean_Small_Business_Owner | SAVING_FREQUENCY | 70 | 1,000 | 0.058 | -0.146 | 0.261 | FALSE |
| Korean_Univ_Students | TOTAL_DEBT | 642 | 1,000 | 0.018 | -0.065 | 0.101 | FALSE |
| Korean_Univ_Students | FINAL_TOTAL_DEBT | 642 | 1,000 | 0.013 | -0.070 | 0.097 | TRUE |
| Korean_Univ_Students | NOAM_MEAN | 642 | 1,000 | -0.010 | -0.093 | 0.074 | TRUE |
| Korean_Univ_Students | SAVING_TOTAL_AMOUNT | 642 | 1,000 | 0.024 | -0.060 | 0.107 | FALSE |
| Korean_Univ_Students | SAVING_FREQUENCY | 642 | 1,000 | -0.018 | -0.101 | 0.065 | FALSE |
| Married_Couples_35to45 | TOTAL_DEBT | 120 | 1,000 | -0.008 | -0.166 | 0.151 | FALSE |
| Married_Couples_35to45 | FINAL_TOTAL_DEBT | 120 | 1,000 | -0.008 | -0.167 | 0.151 | FALSE |
| Married_Couples_35to45 | NOAM_MEAN | 120 | 1,000 | -0.049 | -0.208 | 0.110 | FALSE |
| Married_Couples_35to45 | SAVING_TOTAL_AMOUNT | 120 | 1,000 | -0.019 | -0.177 | 0.140 | FALSE |
| Married_Couples_35to45 | SAVING_FREQUENCY | 120 | 1,000 | 0.008 | -0.151 | 0.167 | FALSE |
| US_Students | TOTAL_DEBT | 92 | 1,000 | 0.006 | -0.174 | 0.185 | FALSE |
| US_Students | FINAL_TOTAL_DEBT | 92 | 1,000 | 0.012 | -0.167 | 0.191 | FALSE |
| US_Students | NOAM_MEAN | 92 | 1,000 | 0.026 | -0.153 | 0.205 | FALSE |
| US_Students | SAVING_TOTAL_AMOUNT | 92 | 1,000 | 0.026 | -0.153 | 0.206 | FALSE |
| US_Students | SAVING_FREQUENCY | 92 | 1,000 | 0.000 | -0.179 | 0.179 | FALSE |

*Passing cells: Korean_Univ_Students—FINAL_TOTAL_DEBT and Korean_Univ_Students—NOAM_MEAN.*

**S5. Core SEA, Adaptive SEA and ablation variants**

Full ablation summaries compare Adaptive SEA with Core SEA and reduced variants. The strongest substantive contrast is between social/trust-directed variants and non-social or mutation-only baselines.

**Supplementary Table S5 | Full ablation summary across SEA variants.**

| **Variant** | **Mean abs. SMD** | **Mean Wasserstein** | **Mean KS** | **Mean energy** | **TOST pass rate** | **Mean NLL** | **Mean Brier** | **Stability** | **Entropy** | **NOAM (terminal)** | **Total debt** |
| --- | --- | --- | --- | --- | --- | --- | --- | --- | --- | --- | --- |
| Adaptive SEA | 1.300 | 87,074.84 | 0.713 | 219.98 | 0.000 | 0.040 | 0.005 | 0.970 | 0.122 | 0.714 | 172,072.53 |
| Core SEA | 1.343 | 88,034.52 | 0.715 | 222.56 | 0.000 | 0.088 | 0.017 | 0.983 | 0.204 | 0.737 | 176,128.57 |
| No trust dynamics | 1.371 | 88,922.89 | 0.711 | 223.98 | 0.000 | 0.119 | 0.023 | 0.971 | 0.273 | 0.767 | 182,387.73 |
| No stochastic exploration | 1.307 | 87,225.45 | 0.716 | 220.75 | 0.000 | 0.022 | 0.003 | 0.990 | 0.060 | 0.724 | 171,801.58 |
| Non-social baseline | 1.619 | 96,404.33 | 0.729 | 240.95 | 0.000 | 0.691 | 0.250 | 0.976 | 0.661 | 0.777 | 192,291.15 |
| Trust-directed reduced variant | 1.282 | 86,471.82 | 0.712 | 218.37 | 0.000 | 0.022 | 0.003 | 0.990 | 0.061 | 0.698 | 166,888.84 |
| Mutation-only baseline | 1.604 | 95,632.85 | 0.727 | 238.70 | 0.000 | 0.738 | 0.272 | 0.977 | 0.679 | 0.805 | 201,729.99 |
| Imitation-only baseline | 1.366 | 88,524.02 | 0.714 | 223.74 | 0.000 | 0.091 | 0.018 | 0.984 | 0.212 | 0.720 | 172,936.41 |

**S6. Revised canonical ablation including Adaptive SEA**

Section S6 reports the revised canonical ablation under a recovery-residual framing. The S6 metric "Mean abs. SMD (recovery residual)" is a post-recovery residual metric and is not directly comparable to the raw-alignment "Mean abs. SMD" in Section S5. Section S5 evaluates raw observed-simulated outcome-distribution alignment, whereas Section S6 evaluates recovery after perturbing empirical structure. The Rank column is ordered by Recovery gain in descending order.

**Supplementary Table S6 | Canonical ablation under recovery-residual framing.**

| **Condition** | **Display name** | **Analysis role** | **Mean abs. SMD (recovery residual)** | **Mean Wasserstein** | **Mean KS** | **Mean energy** | **Recovery gain** | **TOST pass rate (±0.10)** | **n cells** | **Rank** |
| --- | --- | --- | --- | --- | --- | --- | --- | --- | --- | --- |
| Adaptive SEA | Adaptive SEA | SR foundational improved model; general adaptive SEA at framework level | 0.012 | 2,983.04 | 0.126 | 17.46 | 0.916 | 0.08 | 50 | 4 |
| Core SEA | Core SEA (fixed) | Canonical fixed-parameter SEA baseline | 0.005 | 2,766.34 | 0.122 | 16.91 | 0.922 | 0.10 | 50 | 3 |
| No trust dynamics | No trust dynamics | Ablation: removes dynamic credibility updating | 0.003 | 2,100.97 | 0.120 | 15.67 | 0.935 | 0.10 | 50 | 2 |
| No peer imitation | No peer imitation | Ablation: removes social strategy transmission | 0.192 | 46,577.65 | 0.321 | 87.59 | −0.020 | 0.02 | 50 | 6 |
| No stochastic exploration | No stochastic exploration | Ablation: removes stochastic perturbation | 0.011 | 1,541.54 | 0.114 | 14.15 | 0.957 | 0.06 | 50 | 1 |
| Uniform-peer baseline | Uniform-peer baseline | Baseline: removes credibility-weighted peer selection | 0.004 | 60,067.93 | 0.656 | 131.37 | −0.984 | 0.10 | 50 | 8 |
| Random-exploration baseline | Random-exploration baseline | Baseline: perturbation only without trust/imitation | 0.190 | 48,841.68 | 0.317 | 89.12 | −0.073 | 0.00 | 50 | 7 |
| Static mean-preserving baseline | Static mean-preserving baseline | Baseline: preserves mean without SEA adaptation | 0.000 | 41,205.32 | 0.258 | 74.28 | 0.142 | 0.10 | 50 | 5 |
| Simple evolutionary baseline | Simple evolutionary baseline | Baseline: generic evolutionary correction | 0.760 | 46,470.74 | 0.545 | 78.69 | −1.052 | 0.00 | 50 | 9 |

**S7. Ablation contrast uncertainty and false-discovery correction**

The strongest FDR-supported contrasts distinguish Adaptive SEA from social-stripped baselines. After Benjamini–Hochberg correction, contrasts against non-social and mutation-only baselines survive *q* < 0.05 across most primary distance metrics, whereas Adaptive-versus-Core SEA and other within-social-family contrasts do not reach *q* < 0.05. This hierarchy supports the interpretation that the framework’s empirical leverage lies primarily in social/trust-directed adaptation rather than in inferentially separable superiority of a single internal architecture.

**Supplementary Table S7a | FDR-supported contrast hierarchy.**

| **Contrast family** | **q < 0.05 metrics** | **q < 0.10 metrics** | **Minimum q** | **Interpretation** |
| --- | --- | --- | --- | --- |
| Adaptive SEA vs non-social baseline | 4/4 | 4/4 | 0.0000 | Strong FDR-supported separation |
| Adaptive SEA vs mutation-only baseline | 3/4 | 4/4 | 0.0000 | Strong FDR-supported separation |
| Adaptive SEA vs no stochastic exploration | 0/4 | 1/4 | 0.0996 | Borderline (q < 0.10 only) |
| Adaptive SEA vs Core SEA | 0/4 | 0/4 | 0.1120 | Descriptive, not inferential, refinement |
| Adaptive SEA vs no trust dynamics | 0/4 | 0/4 | 0.1120 | Descriptive, not inferential, refinement |
| Adaptive SEA vs imitation-only baseline | 0/4 | 0/4 | 0.1240 | Descriptive, not inferential, refinement |
| Adaptive SEA vs trust-directed reduced variant | 0/4 | 0/4 | 0.2859 | No conventional FDR-supported separation |

Cluster-bootstrap confidence intervals and Benjamini–Hochberg FDR correction are reported for related ablation contrast families. Positive mean differences indicate poorer alignment for the comparison model relative to the reference model.

**Supplementary Table S7b | Cluster-bootstrap confidence intervals and FDR-adjusted q-values.**

| **Contrast** | **Metric** | **Reference model** | **Comparison model** | **n clusters** | **Mean diff.** | **95% CI lower** | **95% CI upper** | **Bootstrap p (two-sided)** | **BH FDR q** |
| --- | --- | --- | --- | --- | --- | --- | --- | --- | --- |
| Core SEA − Adaptive SEA | abs_smd | Adaptive SEA | Core SEA | 10 | 0.050 | −0.015 | 0.137 | 0.176 | 0.274 |
| Core SEA − Adaptive SEA | wasserstein | Adaptive SEA | Core SEA | 10 | 1,181.15 | 50.49 | 2,357.11 | 0.042 | 0.112 |
| Core SEA − Adaptive SEA | ks_distance | Adaptive SEA | Core SEA | 10 | 0.002 | −0.007 | 0.012 | 0.644 | 0.721 |
| Core SEA − Adaptive SEA | energy_distance | Adaptive SEA | Core SEA | 10 | 3.018 | −0.184 | 6.120 | 0.060 | 0.124 |
| No trust dynamics − Adaptive SEA | abs_smd | Adaptive SEA | No trust dynamics | 10 | 0.113 | 0.000 | 0.274 | 0.048 | 0.112 |
| No trust dynamics − Adaptive SEA | wasserstein | Adaptive SEA | No trust dynamics | 10 | 1,920.77 | 47.71 | 4,108.81 | 0.044 | 0.112 |
| No trust dynamics − Adaptive SEA | ks_distance | Adaptive SEA | No trust dynamics | 10 | −0.001 | −0.011 | 0.011 | 0.876 | 0.876 |
| No trust dynamics − Adaptive SEA | energy_distance | Adaptive SEA | No trust dynamics | 10 | 4.283 | −0.581 | 9.850 | 0.090 | 0.168 |
| No stochastic exploration − Adaptive SEA | abs_smd | Adaptive SEA | No stochastic exploration | 10 | 0.031 | −0.031 | 0.118 | 0.454 | 0.605 |
| No stochastic exploration − Adaptive SEA | wasserstein | Adaptive SEA | No stochastic exploration | 10 | 251.27 | −870.36 | 1,630.81 | 0.716 | 0.743 |
| No stochastic exploration − Adaptive SEA | ks_distance | Adaptive SEA | No stochastic exploration | 10 | 0.007 | 0.001 | 0.015 | 0.032 | 0.100 |
| No stochastic exploration − Adaptive SEA | energy_distance | Adaptive SEA | No stochastic exploration | 10 | 0.966 | −2.722 | 4.607 | 0.578 | 0.704 |
| Non-social baseline − Adaptive SEA | abs_smd | Adaptive SEA | Non-social baseline | 10 | 0.359 | 0.243 | 0.511 | 0.000 | 0.000 |
| Non-social baseline − Adaptive SEA | wasserstein | Adaptive SEA | Non-social baseline | 10 | 9,524.64 | 7,900.73 | 11,329.89 | 0.000 | 0.000 |
| Non-social baseline − Adaptive SEA | ks_distance | Adaptive SEA | Non-social baseline | 10 | 0.015 | 0.006 | 0.025 | 0.000 | 0.000 |
| Non-social baseline − Adaptive SEA | energy_distance | Adaptive SEA | Non-social baseline | 10 | 21.200 | 17.120 | 25.410 | 0.000 | 0.000 |
| Trust-directed reduced − Adaptive SEA | abs_smd | Adaptive SEA | Trust-directed reduced | 10 | −0.014 | −0.062 | 0.035 | 0.530 | 0.675 |
| Trust-directed reduced − Adaptive SEA | wasserstein | Adaptive SEA | Trust-directed reduced | 10 | −631.85 | −1,973.90 | 571.56 | 0.334 | 0.468 |
| Trust-directed reduced − Adaptive SEA | ks_distance | Adaptive SEA | Trust-directed reduced | 10 | −0.002 | −0.011 | 0.007 | 0.712 | 0.743 |
| Trust-directed reduced − Adaptive SEA | energy_distance | Adaptive SEA | Trust-directed reduced | 10 | −1.771 | −4.485 | 0.948 | 0.194 | 0.286 |
| Mutation-only baseline − Adaptive SEA | abs_smd | Adaptive SEA | Mutation-only baseline | 10 | 0.361 | 0.212 | 0.561 | 0.000 | 0.000 |
| Mutation-only baseline − Adaptive SEA | wasserstein | Adaptive SEA | Mutation-only baseline | 10 | 8,968.59 | 6,668.24 | 11,490.46 | 0.000 | 0.000 |
| Mutation-only baseline − Adaptive SEA | ks_distance | Adaptive SEA | Mutation-only baseline | 10 | 0.013 | 0.002 | 0.026 | 0.022 | 0.077 |
| Mutation-only baseline − Adaptive SEA | energy_distance | Adaptive SEA | Mutation-only baseline | 10 | 19.090 | 13.520 | 24.850 | 0.000 | 0.000 |
| Imitation-only baseline − Adaptive SEA | abs_smd | Adaptive SEA | Imitation-only baseline | 10 | 0.065 | −0.002 | 0.138 | 0.062 | 0.124 |
| Imitation-only baseline − Adaptive SEA | wasserstein | Adaptive SEA | Imitation-only baseline | 10 | 1,277.05 | −413.62 | 2,785.90 | 0.112 | 0.196 |
| Imitation-only baseline − Adaptive SEA | ks_distance | Adaptive SEA | Imitation-only baseline | 10 | 0.003 | −0.008 | 0.013 | 0.626 | 0.721 |
| Imitation-only baseline − Adaptive SEA | energy_distance | Adaptive SEA | Imitation-only baseline | 10 | 3.377 | −1.241 | 7.537 | 0.168 | 0.274 |

**S8. External comparator benchmarks**

External comparator families were treated as supplementary benchmarks. They were not used to claim uniform model dominance, because different model families captured different aspects of the distribution.

**Supplementary Table S8 | External comparator benchmarks across distance metrics.**

| **Model** | **Mean abs. SMD** | **Mean Wasserstein** | **Mean KS** | **Mean energy** | **TOST pass rate** | **Rank (SMD)** | **Rank (Wasserstein)** |
| --- | --- | --- | --- | --- | --- | --- | --- |
| Adaptive SEA | 1.300 | 87,074.84 | 0.713 | 219.98 | 0.000 | 1 | 4 |
| Delta-rule RL | 1.456 | 85,849.05 | 0.704 | 216.85 | 0.200 | 2 | 1 |
| Conventional EA | 1.473 | 86,447.39 | 0.709 | 218.85 | 0.200 | 3 | 2 |
| UCB bandit | 1.479 | 86,733.81 | 0.712 | 219.43 | 0.200 | 4 | 3 |
| Bayesian belief update | 1.536 | 87,946.95 | 0.712 | 222.31 | 0.000 | 5 | 5 |

**S9. Robustness and sensitivity analyses**

Robustness checks included leave-one-cohort-out model comparison, sample-size-weighted versus equal-cohort-weighted aggregation, fixed-parameter sensitivity and random-effects summaries of model differences.

The Adaptive-versus-Core descriptive difference was directionally stable across all ten leave-one-cohort-out subsets. This result supports robustness of the direction of the modest Adaptive SEA refinement, while not changing the FDR-null interpretation of the Adaptive-versus-Core contrast.

**Supplementary Table S9a | Leave-one-cohort-out: Adaptive vs Core SEA directional consistency.**

| **Omitted cohort** | **Adaptive SEA mean abs. SMD** | **Core SEA mean abs. SMD** | **Core − Adaptive** |
| --- | --- | --- | --- |
| Chinese_Employees | 1.644 | 1.702 | 0.058 |
| Credit_Defaulters | 1.724 | 1.783 | 0.059 |
| European_University_Exchange_Students | 1.732 | 1.776 | 0.044 |
| Expectant_Couples | 1.707 | 1.760 | 0.054 |
| Korean_Adolescents | 1.664 | 1.714 | 0.050 |
| Korean_Senior | 1.464 | 1.481 | 0.018 |
| Korean_Small_Business_Owner | 1.685 | 1.746 | 0.061 |
| Korean_Univ_Students | 1.712 | 1.748 | 0.036 |
| Married_Couples_35to45 | 1.599 | 1.662 | 0.064 |
| US_Students | 1.721 | 1.778 | 0.057 |

**Supplementary Table S9b | Aggregation weighting sensitivity (sample-size-weighted vs equal-cohort-outcome).**

| **Model** | **Weighting** | **Model family** | **Mean abs. SMD** | **Mean Wasserstein** | **Mean KS** | **Mean energy** | **TOST pass rate** |
| --- | --- | --- | --- | --- | --- | --- | --- |
| Adaptive SEA | equal_cohort_outcome | SEA_internal | 1.665 | 88,537.24 | 0.755 | 227.31 | 0.000 |
| Adaptive SEA | sample_size_weighted | SEA_internal | 1.457 | 87,591.27 | 0.745 | 224.39 | 0.000 |
| Core SEA | equal_cohort_outcome | SEA_internal | 1.715 | 89,718.39 | 0.758 | 230.33 | 0.000 |
| Core SEA | sample_size_weighted | SEA_internal | 1.534 | 89,589.54 | 0.741 | 227.86 | 0.000 |
| No trust dynamics | equal_cohort_outcome | SEA_internal | 1.778 | 90,458.02 | 0.755 | 231.59 | 0.000 |
| No trust dynamics | sample_size_weighted | SEA_internal | 1.539 | 89,193.95 | 0.737 | 227.27 | 0.000 |
| No stochastic exploration | equal_cohort_outcome | SEA_internal | 1.696 | 88,788.52 | 0.763 | 228.27 | 0.000 |
| No stochastic exploration | sample_size_weighted | SEA_internal | 1.456 | 87,360.51 | 0.744 | 223.70 | 0.000 |
| Non-social baseline | equal_cohort_outcome | SEA_internal | 2.024 | 98,061.89 | 0.771 | 248.50 | 0.000 |
| Non-social baseline | sample_size_weighted | SEA_internal | 1.820 | 97,936.90 | 0.754 | 246.90 | 0.000 |
| Trust-directed reduced variant | equal_cohort_outcome | SEA_internal | 1.651 | 87,905.40 | 0.753 | 225.54 | 0.000 |
| Trust-directed reduced variant | sample_size_weighted | SEA_internal | 1.473 | 87,647.84 | 0.737 | 223.46 | 0.000 |
| Mutation-only baseline | equal_cohort_outcome | SEA_internal | 2.026 | 97,505.83 | 0.769 | 246.40 | 0.000 |
| Mutation-only baseline | sample_size_weighted | SEA_internal | 1.779 | 96,342.02 | 0.748 | 242.19 | 0.000 |
| Imitation-only baseline | equal_cohort_outcome | SEA_internal | 1.731 | 89,814.29 | 0.758 | 230.69 | 0.000 |
| Imitation-only baseline | sample_size_weighted | SEA_internal | 1.522 | 88,610.24 | 0.740 | 226.41 | 0.000 |
| Bayesian belief update | equal_cohort_outcome | external_comparator | 2.007 | 89,220.29 | 0.743 | 228.73 | 0.000 |
| Bayesian belief update | sample_size_weighted | external_comparator | 1.696 | 88,170.12 | 0.727 | 224.95 | 0.000 |
| Conventional EA | equal_cohort_outcome | external_comparator | 1.929 | 87,748.61 | 0.741 | 225.29 | 0.000 |
| Conventional EA | sample_size_weighted | external_comparator | 1.633 | 86,552.98 | 0.722 | 221.18 | 0.000 |
| Delta-rule RL | equal_cohort_outcome | external_comparator | 1.903 | 87,017.13 | 0.735 | 223.05 | 0.000 |
| Delta-rule RL | sample_size_weighted | external_comparator | 1.611 | 85,840.47 | 0.721 | 219.14 | 0.000 |
| UCB bandit | equal_cohort_outcome | external_comparator | 1.945 | 87,912.58 | 0.743 | 225.73 | 0.000 |
| UCB bandit | sample_size_weighted | external_comparator | 1.651 | 86,928.92 | 0.725 | 221.92 | 0.000 |

**S10. Parameter sensitivity**

The parameter grid varies fixed framework-level parameters only. The grid was designed as a sensitivity diagnostic, not a global optimisation search; the best-performing grid cell lying at a boundary should therefore be interpreted cautiously.

**Supplementary Table S10 | Fixed-parameter sensitivity grid (α, β, μ).**

| **α** | **β** | **μ** | **Mean abs. SMD (proxy)** | **Mean Wasserstein (proxy)** | **Recovery index** | **Note** |
| --- | --- | --- | --- | --- | --- | --- |
| 0.05 | 0.10 | 0.00 | 0.309 | 8,824.97 | 0.118 | SR fixed-parameter sensitivity diagnostic |
| 0.05 | 0.10 | 0.03 | 0.315 | 10,324.97 | 0.118 | SR fixed-parameter sensitivity diagnostic |
| 0.05 | 0.10 | 0.07 | 0.323 | 12,324.97 | 0.118 | SR fixed-parameter sensitivity diagnostic |
| 0.05 | 0.25 | 0.00 | 0.256 | 7,316.16 | 0.268 | SR fixed-parameter sensitivity diagnostic |
| 0.05 | 0.25 | 0.03 | 0.262 | 8,816.16 | 0.268 | SR fixed-parameter sensitivity diagnostic |
| 0.05 | 0.25 | 0.07 | 0.270 | 10,816.16 | 0.268 | SR fixed-parameter sensitivity diagnostic |
| 0.05 | 0.40 | 0.00 | 0.212 | 6,065.31 | 0.393 | SR fixed-parameter sensitivity diagnostic |
| 0.05 | 0.40 | 0.03 | 0.218 | 7,565.31 | 0.393 | SR fixed-parameter sensitivity diagnostic |
| 0.05 | 0.40 | 0.07 | 0.226 | 9,565.31 | 0.393 | SR fixed-parameter sensitivity diagnostic |
| 0.15 | 0.10 | 0.00 | 0.241 | 6,872.89 | 0.313 | SR fixed-parameter sensitivity diagnostic |
| 0.15 | 0.10 | 0.03 | 0.247 | 8,372.89 | 0.313 | SR fixed-parameter sensitivity diagnostic |
| 0.15 | 0.10 | 0.07 | 0.255 | 10,372.89 | 0.313 | SR fixed-parameter sensitivity diagnostic |
| 0.15 | 0.25 | 0.00 | 0.137 | 3,916.06 | 0.608 | SR fixed-parameter sensitivity diagnostic |
| 0.15 | 0.25 | 0.03 | 0.143 | 5,416.06 | 0.608 | SR fixed-parameter sensitivity diagnostic |
| 0.15 | 0.25 | 0.07 | 0.151 | 7,416.06 | 0.608 | SR fixed-parameter sensitivity diagnostic |
| 0.15 | 0.40 | 0.00 | 0.078 | 2,231.30 | 0.777 | SR fixed-parameter sensitivity diagnostic |
| 0.15 | 0.40 | 0.03 | 0.084 | 3,731.30 | 0.777 | SR fixed-parameter sensitivity diagnostic |
| 0.15 | 0.40 | 0.07 | 0.092 | 5,731.30 | 0.777 | SR fixed-parameter sensitivity diagnostic |
| 0.30 | 0.10 | 0.00 | 0.165 | 4,723.67 | 0.528 | SR fixed-parameter sensitivity diagnostic |
| 0.30 | 0.10 | 0.03 | 0.171 | 6,223.67 | 0.528 | SR fixed-parameter sensitivity diagnostic |
| 0.30 | 0.10 | 0.07 | 0.179 | 8,223.67 | 0.528 | SR fixed-parameter sensitivity diagnostic |
| 0.30 | 0.25 | 0.00 | 0.054 | 1,533.55 | 0.847 | SR fixed-parameter sensitivity diagnostic |
| 0.30 | 0.25 | 0.03 | 0.060 | 3,033.55 | 0.847 | SR fixed-parameter sensitivity diagnostic |
| 0.30 | 0.25 | 0.07 | 0.068 | 5,033.55 | 0.847 | SR fixed-parameter sensitivity diagnostic |
| 0.30 | 0.40 | 0.00 | 0.017 | 497.87 | 0.950 | SR fixed-parameter sensitivity diagnostic |
| 0.30 | 0.40 | 0.03 | 0.023 | 1,997.87 | 0.950 | SR fixed-parameter sensitivity diagnostic |
| 0.30 | 0.40 | 0.07 | 0.031 | 3,997.87 | 0.950 | SR fixed-parameter sensitivity diagnostic |

**S11. Model-difference random-effects summaries**

Random-effects summaries of model differences provide heterogeneity-aware summaries of key contrasts.

**Supplementary Table S11 | Random-effects summaries of model-difference contrasts.**

| **Contrast** | **Metric** | **k** | **Mean diff.** | **95% CI lower** | **95% CI upper** | **τ² (descriptive)** | **Comparison worse if positive** |
| --- | --- | --- | --- | --- | --- | --- | --- |
| Core SEA − Adaptive SEA | abs_smd | 10 | 0.050 | −0.029 | 0.128 | 0.016 | yes |
| Core SEA − Adaptive SEA | wasserstein | 10 | 1,181.15 | −86.29 | 2,448.60 | 4,181,638.61 | yes |
| Core SEA − Adaptive SEA | ks_distance | 10 | 0.002 | −0.008 | 0.012 | 0.000 | yes |
| Non-social baseline − Adaptive SEA | abs_smd | 10 | 0.359 | 0.220 | 0.497 | 0.050 | yes |
| Non-social baseline − Adaptive SEA | wasserstein | 10 | 9,524.64 | 7,725.05 | 11,324.23 | 8,430,138.14 | yes |
| Non-social baseline − Adaptive SEA | ks_distance | 10 | 0.015 | 0.005 | 0.026 | 0.000 | yes |
| Mutation-only baseline − Adaptive SEA | abs_smd | 10 | 0.361 | 0.174 | 0.547 | 0.091 | yes |
| Mutation-only baseline − Adaptive SEA | wasserstein | 10 | 8,968.59 | 6,420.21 | 11,516.97 | 16,905,016.43 | yes |
| Mutation-only baseline − Adaptive SEA | ks_distance | 10 | 0.013 | 0.000 | 0.026 | 0.000 | yes |
| Trust-directed reduced − Adaptive SEA | abs_smd | 10 | −0.014 | −0.065 | 0.036 | 0.007 | yes |
| Trust-directed reduced − Adaptive SEA | wasserstein | 10 | −631.85 | −1,912.97 | 649.28 | 4,272,396.66 | yes |
| Trust-directed reduced − Adaptive SEA | ks_distance | 10 | −0.002 | −0.012 | 0.008 | 0.000 | yes |
| No stochastic exploration − Adaptive SEA | abs_smd | 10 | 0.031 | −0.052 | 0.114 | 0.018 | yes |
| No stochastic exploration − Adaptive SEA | wasserstein | 10 | 251.27 | −1,084.05 | 1,586.59 | 4,641,487.86 | yes |
| No stochastic exploration − Adaptive SEA | ks_distance | 10 | 0.007 | −0.001 | 0.015 | 0.000 | yes |
| Bayesian belief update − Adaptive SEA | abs_smd | 10 | 0.342 | 0.221 | 0.463 | 0.038 | yes |
| Bayesian belief update − Adaptive SEA | wasserstein | 10 | 683.04 | −456.55 | 1,822.64 | 3,380,554.55 | yes |
| Bayesian belief update − Adaptive SEA | ks_distance | 10 | −0.013 | −0.021 | −0.005 | 0.000 | yes |
| Delta-rule RL − Adaptive SEA | abs_smd | 10 | 0.238 | 0.166 | 0.311 | 0.014 | yes |
| Delta-rule RL − Adaptive SEA | wasserstein | 10 | −1,520.11 | −2,470.98 | −569.24 | 2,353,583.67 | yes |
| Delta-rule RL − Adaptive SEA | ks_distance | 10 | −0.021 | −0.030 | −0.011 | 0.000 | yes |
| UCB bandit − Adaptive SEA | abs_smd | 10 | 0.280 | 0.207 | 0.353 | 0.014 | yes |
| UCB bandit − Adaptive SEA | wasserstein | 10 | −624.66 | −1,539.77 | 290.44 | 2,179,857.47 | yes |
| UCB bandit − Adaptive SEA | ks_distance | 10 | −0.012 | −0.020 | −0.005 | 0.000 | yes |
| Conventional EA − Adaptive SEA | abs_smd | 10 | 0.264 | 0.182 | 0.345 | 0.017 | yes |
| Conventional EA − Adaptive SEA | wasserstein | 10 | −788.64 | −2,151.52 | 574.25 | 4,835,099.88 | yes |
| Conventional EA − Adaptive SEA | ks_distance | 10 | −0.014 | −0.023 | −0.006 | 0.000 | yes |

**S12. Leave-one-cohort-out sensitivity**

Leave-one-cohort-out results were used to check whether a single large cohort drove the model-comparison pattern. The machine-readable CSV contains all omitted-cohort combinations.

**Supplementary Table S12 | Leave-one-cohort-out model comparisons (excerpt).**

| **Omitted cohort** | **Model** | **Model family** | **Mean abs. SMD** | **Mean Wasserstein** | **Mean KS** | **Mean energy** | **TOST pass rate** |
| --- | --- | --- | --- | --- | --- | --- | --- |
| Chinese_Employees | Adaptive SEA | SEA_internal | 1.644 | 89,469.38 | 0.761 | 228.55 | 0.000 |
| Chinese_Employees | Core SEA | SEA_internal | 1.702 | 90,708.68 | 0.761 | 231.15 | 0.000 |
| Chinese_Employees | Trust-directed reduced variant | SEA_internal | 1.622 | 88,543.65 | 0.758 | 225.88 | 0.000 |
| Chinese_Employees | No trust dynamics | SEA_internal | 1.754 | 91,299.72 | 0.760 | 232.52 | 0.000 |
| Chinese_Employees | No stochastic exploration | SEA_internal | 1.679 | 89,686.19 | 0.768 | 229.34 | 0.000 |
| Chinese_Employees | Imitation-only baseline | SEA_internal | 1.703 | 90,582.16 | 0.761 | 231.06 | 0.000 |
| Chinese_Employees | Non-social baseline | SEA_internal | 1.994 | 99,061.71 | 0.774 | 249.44 | 0.000 |
| Chinese_Employees | Mutation-only baseline | SEA_internal | 1.976 | 98,072.82 | 0.771 | 246.62 | 0.000 |
| Chinese_Employees | Bayesian belief update | external_comparator | 1.995 | 90,202.15 | 0.749 | 229.89 | 0.000 |
| Chinese_Employees | Conventional EA | external_comparator | 1.910 | 88,637.25 | 0.746 | 226.21 | 0.000 |
| Chinese_Employees | Delta-rule RL | external_comparator | 1.882 | 87,813.11 | 0.740 | 223.71 | 0.000 |
| Chinese_Employees | UCB bandit | external_comparator | 1.924 | 88,767.40 | 0.749 | 226.59 | 0.000 |
| Credit_Defaulters | Adaptive SEA | SEA_internal | 1.724 | 86,122.82 | 0.760 | 227.28 | 0.000 |
| Credit_Defaulters | Core SEA | SEA_internal | 1.783 | 87,393.81 | 0.761 | 230.56 | 0.000 |
| Credit_Defaulters | Trust-directed reduced variant | SEA_internal | 1.712 | 85,372.89 | 0.756 | 225.20 | 0.000 |
| Credit_Defaulters | No trust dynamics | SEA_internal | 1.855 | 88,570.20 | 0.760 | 232.94 | 0.000 |
| Credit_Defaulters | No stochastic exploration | SEA_internal | 1.762 | 86,567.78 | 0.768 | 228.84 | 0.000 |
| Credit_Defaulters | Imitation-only baseline | SEA_internal | 1.796 | 87,441.39 | 0.764 | 231.05 | 0.000 |
| Credit_Defaulters | Non-social baseline | SEA_internal | 2.106 | 96,014.67 | 0.776 | 249.51 | 0.000 |
| Credit_Defaulters | Mutation-only baseline | SEA_internal | 2.111 | 95,399.63 | 0.773 | 246.94 | 0.000 |
| Credit_Defaulters | Bayesian belief update | external_comparator | 2.087 | 86,790.70 | 0.747 | 228.73 | 0.000 |
| Credit_Defaulters | Conventional EA | external_comparator | 2.002 | 85,222.55 | 0.746 | 225.12 | 0.000 |
| Credit_Defaulters | Delta-rule RL | external_comparator | 1.974 | 84,514.74 | 0.738 | 222.81 | 0.000 |
| Credit_Defaulters | UCB bandit | external_comparator | 2.021 | 85,539.59 | 0.747 | 225.90 | 0.000 |
| European_University_Exchange_Students | Adaptive SEA | SEA_internal | 1.732 | 89,020.29 | 0.756 | 228.92 | 0.000 |
| European_University_Exchange_Students | Core SEA | SEA_internal | 1.776 | 90,247.33 | 0.761 | 232.26 | 0.000 |
| European_University_Exchange_Students | No stochastic exploration | SEA_internal | 1.752 | 88,908.36 | 0.764 | 229.08 | 0.000 |
| European_University_Exchange_Students | No trust dynamics | SEA_internal | 1.839 | 90,586.49 | 0.758 | 232.51 | 0.000 |
| European_University_Exchange_Students | Non-social baseline | SEA_internal | 2.091 | 98,441.98 | 0.774 | 249.93 | 0.000 |
| European_University_Exchange_Students | Mutation-only baseline | SEA_internal | 2.102 | 98,220.05 | 0.771 | 248.31 | 0.000 |

*Note: Excerpt of three omitted cohorts shown for display. The complete leave-one-cohort-out comparison covering all ten cohorts × twelve models is provided in source_tables/leave_one_cohort_out_comparison.csv.*

**S13. Reproducibility manifest**

The accompanying package includes source CSV files, figure files, manuscript and supplementary drafts, and a SHA256 manifest. Reproducibility materials are released with the Zenodo DOI 10.5281/zenodo.17375071 and access conditions described in the main manuscript Data availability statement.

**S14. Mathematical specification of Core SEA and Adaptive SEA**

This section provides the formal equation summary for the two SEA framework variants evaluated in the manuscript. Core SEA corresponds to the source-code label SEA_Original; Adaptive SEA corresponds to the source-code label SEA_Improved. The specification below documents the framework-level update logic; canonical simulation outputs (Tables S5–S8) were generated by the original analysis pipeline and the canonical CSVs are SHA-pinned in the reproducibility archive.

**S14.1 Core SEA**

Core SEA uses a fixed trust learning rate, fixed bounded imitation strength and a fixed exploration probability.

*Trust update.*

Ti,j(t+1) = Ti,j(t) + α · max{0, Rj(t) − R̄(t)}, where R̄(t) = (1/N) Σ Rk(t)

Trust from agent i toward agent j increases only when j performs above the contemporaneous group mean. The fixed learning rate α controls the magnitude of update.

*Bounded imitation.*

Si(t+1) = (1 − μ) Si(t) + μ Sj*(t), j* = arg maxk Ti,k(t)

Agent i partially adopts the strategy of the most trusted reference j*. The constant μ determines how strongly the focal agent moves toward the reference strategy.

*Stochastic exploration.*

ηi(t) ~ Bernoulli(θ), with θ a fixed exploration probability

With probability θ, agent i applies a bounded perturbation to its strategy rather than relying solely on imitation; the perturbation is projected back onto the feasible strategy space.

**S14.2 Adaptive SEA**

Adaptive SEA retains the same broad social-evolutionary structure as Core SEA but allows the trust learning rate, imitation strength and exploration probability to vary with state-level diagnostics. Two diagnostics are used to drive the adaptive schedules: round-to-round volatility V(t) of the cohort-level mean performance signal, and uncertainty U(t) summarised as the mean Shannon entropy of predicted state-transition distributions.

*Adaptive trust update.*

Ti,j(t+1) = Ti,j(t) + αt(Vt) · max{0, Rj(t) − R̄(t)}

The adaptive trust learning rate is bounded and increases under higher volatility, allowing trust updating to respond more strongly when the performance signal is changing rapidly. A bounded transformation (e.g., a hyperbolic tangent or logistic mapping of standardised V) is used to keep the rate within an admissible range.

*Uncertainty-sensitive imitation.*

μt(Ut) = μ0 − u · (Ut − U0)

Imitation strength is modulated relative to a baseline μ₀ as the current uncertainty U(t) deviates from the baseline U₀. Higher uncertainty reduces effective imitation strength, preventing strong copying of peer strategies under high entropy.

*Adaptive exploration.*

θt = θ0 + γ · (Ht − H0)

The exploration probability is updated as a function of the current entropy or diversity H(t) relative to the baseline H₀. This allows the framework to regulate exploration dynamically: exploration decreases as the strategy distribution stabilises and increases when uncertainty or misalignment remains high.

**S14.3 Symbol glossary**

T_{i,j}(t): trust that agent i places in agent j at time t. R_j(t): performance signal of agent j at time t (defined as R = −z(NOAM)). R̄(t): cohort mean performance at time t. α (Core): fixed trust learning rate. α_t(V_t) (Adaptive): bounded adaptive learning rate driven by volatility V(t) = |meanR(t) − meanR(t−1)|. S_i(t): strategy vector of agent i at time t. μ (Core): fixed imitation strength. μ_0, U_0 (Adaptive): baseline imitation strength and baseline uncertainty. U(t) (Adaptive): current uncertainty, computed as the mean Shannon entropy of predicted transition distributions. θ (Core): fixed exploration probability. θ_t (Adaptive): adaptive exploration probability. H_0, H_t (Adaptive): baseline and current entropy of the strategy distribution. η_i(t): exploration event indicator for agent i.

**S14.4 Compact statement**

Core SEA: fixed trust update α, fixed imitation μ, and fixed exploration θ. Adaptive SEA: adaptive trust update α_t(V_t), uncertainty-sensitive imitation μ_t(U_t), and adaptive exploration θ_t(H_t). The Adaptive SEA framework therefore introduces three state-dependent components on top of Core SEA, each governed by a single bounded transformation of a state-level diagnostic. Numerical outputs used for the reported comparisons are preserved as canonical, SHA-pinned source tables in the reproducibility archive; the equations above provide the framework-level mathematical specification rather than a byte-exact reconstruction of the original simulation pipeline.

**S15. DebtCON task implementation and outcome formulas**

This section documents the exact task implementation and outcome formulas used by the DebtCON platform across the ten cohorts. All cohorts used the same task constants and the same pay-then-interest accounting rule (repayments are applied first; interest accrues only on remaining balances).

**S15.1 Task constants**

The task comprises 25 rounds. Income per round is $5,000. Three bonus rounds add additional cash: round 6 (+$20,000), round 12 (+$15,000) and round 19 (+$40,000). The savings annual rate is 2.00%, applied on a per-round basis as r_save,round = 0.02 / 12. Six debt accounts (A–F) are present with fixed initial principals of $3,000, $8,000, $11,000, $13,000, $52,000 and $60,000, and per-round interest rates of 0.025, 0.020, 0.035, 0.0325, 0.0375 and 0.040, respectively. The normatively optimal allocation order under a highest-interest-first (avalanche) rule is F → E → C → D → A → B.

**S15.2 Round cash availability**

Cash_t = Carry_{t−1} + Income_t + Bonus_t, where Income_t = 5,000 and Bonus_t = 20,000 if t = 6, 15,000 if t = 12, 40,000 if t = 19, otherwise 0.

**S15.3 Allocation**

Normative weights: w_norm,j = r_j / Σ_k r_k. Equal weights: w_eq,j = 1/6. Mixed allocation: w_debt,t = a_t · w_norm + (1 − a_t) · w_eq, where a_t ∈ [0, 1] is the round-level normative-alignment scalar. Softmax allocation: u_j,t = w_debt,j,t + ε_alloc,j,t; π_j,t = softmax(u_j,t). Payment to account j: Payment_j,t = min(π_j,t · RepaymentCash_t, Debt_j,t^pre). Saving decision: logit_s,t = θ_s + k_s · a_t + N(0, μ_t); s_frac,t = sigmoid(logit_s,t), with a Bernoulli gate.

**S15.4 NOAM definition**

Per-round NOAM: NOAM_t = 1 − (Repayment_highest,t / TotalRepayment_t), where Repayment_highest,t is the repayment routed to the highest-interest remaining account in round t. Cohort-level NOAM_MEAN is the round-averaged value: NOAM_MEAN = (1/25) · Σ_t NOAM_t. NOAM is undefined when TotalRepayment_t = 0; such rounds contribute zero to the cumulative misallocation but are excluded from the per-round NOAM mean.

**S15.5 Reward signal**

DebtImprovement_t = TotalDebt_before,t − TotalDebt_after,t. Reward_t = (DebtImprovement_t / Debt_0) − 0.2 · NOAM_t. The reward signal feeds into the SEA performance signal R as defined in Section S14.

**S15.6 Terminal outcome formulas**

TOTAL_DEBT = Σ_j Debt_j,25 (gross terminal debt at round 25). CASH_AVAILABLE_R25 = Income_25 + SavingsAfterR24 + CashCarryAfterR24 (cash and savings available at the end of the protocol). FINAL_TOTAL_DEBT = TOTAL_DEBT − CASH_AVAILABLE_R25 (terminal debt net of available cash). SAVING_TOTAL_AMOUNT is the cumulative saving amount across the 25 rounds, and SAVING_FREQUENCY is the count of rounds in which a positive saving event occurred.

***Figure file specification:*** *All supplementary figures (if any) are supplied as separate high-resolution files at 600 DPI in TIFF or PNG format, with sans-serif labels (Arial), per Scientific Reports submission requirements.*
